# Supplementary material
Source: Springer Nature journal article supplement (https://www.springermedizin.de/resource/supplementary/12916_2014_987_MOESM4_ESM.pdf/9598962)
Supplement: MOESM4 [file 9598962]

**Supplemental Figure 3. Network of included RCTs for the base case PFS based on Kaplan Meier curves: Risk of bias per trial**

|                    | Random sequence generation (selection bias) | Allocation concealment (selection bias) | Blinding of participants and personnel (performance bias) | Blinding of outcome assessment (detection bias) | Incomplete outcome data (attrition bias) | Selective reporting (reporting bias) |
|--------------------|---------------------------------------------|-----------------------------------------|-----------------------------------------------------------|-------------------------------------------------|------------------------------------------|--------------------------------------|
| ANZBCTG 1986       | ?                                           | +                                       | +                                                         | ?                                               | +                                        | +                                    |
| BOLERO-II          | ?                                           | ?                                       | +                                                         | +                                               | ?                                        | +                                    |
| BSMO STUDY         | ?                                           | ?                                       | +                                                         | ?                                               | ?                                        | ?                                    |
| CHAN 1999          | ?                                           | +                                       | +                                                         | ?                                               | +                                        | +                                    |
| COWAN 1991         | ?                                           | ?                                       | ?                                                         | +                                               | +                                        | +                                    |
| DIXON 1992         | ?                                           | ?                                       | +                                                         | ?                                               | ?                                        | +                                    |
| E1193              | ?                                           | ?                                       | ?                                                         | ?                                               | ?                                        | +                                    |
| EORTC-10811        | +                                           | ?                                       | ?                                                         | ?                                               | ?                                        | ?                                    |
| EORTC-10951        | +                                           | +                                       | +                                                         | ?                                               | +                                        | +                                    |
| GILL 1993          | ?                                           | +                                       | ?                                                         | ?                                               | ?                                        | ?                                    |
| GRADISHAR 2009     | ?                                           | ?                                       | +                                                         | +                                               | ?                                        | +                                    |
| HENDERSON 1989     | +                                           | +                                       | ?                                                         | ?                                               | +                                        | +                                    |
| INGLE 1982         | ?                                           | ?                                       | ?                                                         | ?                                               | ?                                        | +                                    |
| JCOG9802           | +                                           | +                                       | +                                                         | ?                                               | +                                        | +                                    |
| JONES 2005         | ?                                           | ?                                       | +                                                         | ?                                               | +                                        | +                                    |
| KAUFMANN 2000      | +                                           | +                                       | +                                                         | +                                               | ?                                        | ?                                    |
| MEIER 2008         | ?                                           | ?                                       | ?                                                         | ?                                               | ?                                        | ?                                    |
| O'BRIEN 2004       | ?                                           | ?                                       | +                                                         | ?                                               | +                                        | +                                    |
| O'SHAUGHNESSY 2001 | ?                                           | ?                                       | +                                                         | +                                               | +                                        | +                                    |
| PARIDAENS 2000     | ?                                           | ?                                       | +                                                         | +                                               | +                                        | +                                    |
| POA STUDY          | ?                                           | ?                                       | ?                                                         | ?                                               | ?                                        | +                                    |
| TAMRAD             | ?                                           | ?                                       | +                                                         | ?                                               | ?                                        | +                                    |
| VILLALON 1993      | ?                                           | ?                                       | +                                                         | ?                                               | ?                                        | +                                    |
| YARDLEY 2009       | ?                                           | ?                                       | ?                                                         | ?                                               | +                                        | +                                    |

Red=High risk of bias; Yellow=Unclear risk of bias; Green=Low risk of bias.
